# Supplementary material for: Multi-omics integration reveals sex-based differences in the circulating extracellular vesicle lipidome and miRNome of alcohol use disorder patients
Source: Research Square preprint supplement (doi:10.21203/rs.3.rs-7407864/v1), 2025-09-03
Supplement: Supplementary file 1 [file 088781a45cdb0d2de5a0cddd.docx]

**Table 1. AUD Signature Based on Multi-omics Integration (Component 1).**

| **FEATURE** | **PATTERN** | **DEA/DAA** |  | **FEATURE** | **PATTERN** | **DEA/DAA** |
| --- | --- | --- | --- | --- | --- | --- |
| Cer_AP t46:1_neg | + | F |  | Cer_NS d18:2_23:0_neg | - | F & M |
| Cer_NDS d41:2_neg | + |  |  | EtherPC 16:0e_18:2_neg | - | F & M |
| FA 20:3_neg | + | M |  | EtherPC 38:5e_neg | - | M |
| LPE 18:0_neg | + |  |  | FA 22:0 RT:6.523_neg | - |  |
| SM d44:2_pos | + |  |  | PC 19:2_pos | - | M |
| hsa-miR-10399-5p | + | M |  | PC 32:3 RT:6.415_pos | - |  |
| hsa-miR-130b-3p | + |  |  | PC 37:5 RT:7.980_pos | - |  |
| hsa-miR-148a-3p | + | M |  | PI 18:0_18:2_neg | - | M |
| hsa-miR-148a-5p | + | M |  | SM d18:2_24:0_neg | - | F & M |
| hsa-miR-192-5p | + | M |  | SM d31:1_pos | - |  |
| hsa-miR-194-5p | + | F |  | SM d35:1 RT:9.090_pos | - |  |
| hsa-miR-21-5p | + | M |  | TG 16:0_17:1_18:1 RT:16.008_pos | - |  |
| hsa-miR-223-5p | + |  |  | TG 51:3_pos | - |  |
| hsa-miR-340-5p | + | M |  | TG 51:4 RT:14.189_pos | - |  |
| hsa-miR-363-3p | + | M |  | hsa-let-7b-5p | - | M |
| hsa-miR-486-5p | + | M |  | hsa-miR-148b-3p | - |  |
| hsa-miR-589-5p | + |  |  | hsa-miR-181d-5p | - |  |
| hsa-miR-7706 | + | M |  | hsa-miR-331-3p | - |  |
| hsa-miR-99b-3p | + | M |  | hsa-miR-454-3p | - |  |
|  |  |  |  | hsa-miR-556-5p | - | M |

This panel includes 40 features (lipids and miRNAs) identified through block.sPLS. Positive (+) or negative (-) symbols indicate the correlation of the feature with the AUD condition. DEA/DAA column indicates the sex where the feature presented a statistical significance in the individual regression analyses. *AUD: Alcohol use disorder, DEA: Differential Expression Analysis of miRNome, DAA: Differential Abundance Analysis of lipidome / M: male, F: female.*
